# Supplementary material for: The hypothalamic–pituitary–testicular axis and the testicular function are modulated after silver nanoparticle exposure
Source: Royal Society of Chemistry journal article supplement (doi:10.1039/c7tx00236j), 2017-11-23
Supplement: c7tx00236j3.pdf [file c7tx00236j3.pdf]

### **Supplementary figure**

**Suppl Fig 1** – Body growth in male rats exposed to AgNPs during the prepubertal period. The data are presented as the mean  $\pm$  SEM for rats exposed to 0 (control), 15, 7.5, 3.75 or 1.875  $\mu\text{g}$  of AgNP/kg BW (n = 12/group; MANOVA,  $P > 0.05$ ).
