# Supplementary material for: The hypothalamic–pituitary–testicular axis and the testicular function are modulated after silver nanoparticle exposure
Source: Royal Society of Chemistry journal article supplement (doi:10.1039/c7tx00236j), 2017-11-23
Supplement: c7tx00236j4.pdf [file c7tx00236j4.pdf]

1 **Supplementary tables**

2

3 **Supplementary Table 1** – Time development of AgNPs size after dilution with deionized

4 water (DH) or simulated gastric fluid (SGF)

| <b>Time development of AgNPs size (nm)</b> | <b>DH</b>    | <b>SGF (pH 1.2)</b> |
|--------------------------------------------|--------------|---------------------|
| 0 min                                      | 91.8 ± 2.9   | 156.5 ± 12.1        |
| 30 min                                     | 117.7 ± 17.0 | 247.8 ± 10.8        |
| 60 min                                     | 152.5 ± 40.8 | 266.5 ± 1.5         |
| 120 min                                    | 139.5 ± 18.7 | 341.0 ± 8.1         |

5

Data are expressed as mean ± standard error of the mean

6

7

9 **Supplementary Table 2** – Primers used for real-time PCR analyses.

| <i>Gene nomenclature (RGD)</i>                                             | <i>NCBI Reference Sequence</i> | <i>Primer sequence (5' - 3')</i>                         |
|----------------------------------------------------------------------------|--------------------------------|----------------------------------------------------------|
| <i>Ar</i><br>(Androgen receptor)                                           | NM_012502.1                    | F: GCCATGGGTTGGCGGTCCTT<br>R: AGGTGCCTCATCCTCACGCACT     |
| <i>Esr1</i><br>(Estrogen receptor 1)                                       | NM_012689.1                    | F: CCATATCCGGCACATGAGTA<br>R: TGAAGACGATGAGCATCCAG       |
| <i>Esr2</i><br>(Estrogen receptor 2)                                       | NM_012754.1                    | F: CTCACGTCAGGCACATCAGT<br>R: TGTGAGCATTACAGCATCTCC      |
| <i>Gper1</i><br>(G protein-coupled estrogen receptor 1)                    | NM_133573.1                    | F: CCCTTGACAGGCCACATAGT<br>R: CTCCGTGCTGTCTGGTATGA       |
| <i>Gnrh1</i><br>(Gonadotropin releasing hormone 1)                         | NM_012767.2                    | F: AGGAGCTCTGGAACGTCTGAT<br>R: AGCGTCAATGTCACACTCGG      |
| <i>Gnrhr</i><br>(Gonadotropin releasing hormone receptor)                  | NM_031038.3                    | F: GCTGCCTGTTTCATCATCCCT<br>R: CTGTAGTTTGCGTGGGTCCT      |
| <i>Lhb</i><br>(Luteinizing hormone beta polypeptide)                       | NM_012858.2                    | F: ATGAGTTCTGCCAGTCTGC<br>R: GTGGGTGGGCATCAGAAGAG        |
| <i>Fshb</i><br>(Follicle stimulating hormone beta subunit)                 | NM_001007597.1                 | F: AAGTCGATCCAGCTTTGCAT<br>R: GTCCCAGGCCTCTTACAGTG       |
| <i>Lhcgr</i><br>(Luteinizing hormone/choriogonadotropin receptor)          | NM_012978.1                    | F: AGTGGAGCCTTCCAGGGGGC<br>R: AGGAAGACAGGGCGATGAGCGT     |
| <i>Fshr</i><br>(Follicle stimulating hormone receptor)                     | NM_199237.1                    | F: TCACTGGCTGTGTCATTGCTC<br>R: GAGATCTCTATTTTCTCCAGGTCTC |
| <i>Inhbb</i><br>(Inhibin beta B subunit)                                   | NM_080771.1                    | F: GAGCGCGTCTCTGAGATCAT<br>R: GAAGAAGTACAGGCGGACCC       |
| <i>Cyp19a1</i><br>(cytochrome P450, family 19, subfamily a, polypeptide 1) | NM_017085.2                    | F: CGTCATGTTGCTTCTCATCG<br>R: TACCGCAGGCTCTCGTTAAT       |
| <i>Rpl19</i><br>(Ribosomal protein L19)                                    | NM_031103.1                    | F: CAATGAAACCAACGAAATCG<br>R: TCAGGCCATCTTTGATCAGCT      |

10 F, forward; R, reverse
